# Supplementary material for: Transcriptional Profiling of Plasmodium falciparum Parasites from Patients with Severe Malaria Identifies Distinct Low vs. High Parasitemic Clusters
Source: PLOS journal article supplement (doi:10.1371/journal.pone.0040739), 2012-07-18
Supplement: S10 (10.1371/journal.pone.0040739.s010) [file journal.pone.0040739.s010]

**Supplemental Table 5:** After supervised clustering of samples which only have positive signs of malaria retinopathy, two resultant clusters emerged (I and II) for which clinical variables were compared. The retinopathy negative patients are shown for reference. The p-values are for the difference between Retinopathy I and II. The variables values shown in bold text were significantly different (less than 0.05) from the retinopathy negative group.

| Variable                               | Retinopathy + (I)      | Retinopathy + (II)    | Retinopathy - (A & B) | p-value |
|----------------------------------------|------------------------|-----------------------|-----------------------|---------|
| Parasitemia (x 10 <sup>3</sup> p/ul)   | 26.4 [12.7 - 39.4]     | 361.4 [137.3 - 556.9] | 84.4 [43.1 - 337.1]   | <0.001  |
| WBC (x 10 <sup>3</sup> cells/mL)       | 16.5 ± 17.2            | 10.7 ± 5.6            | 12.6 ± 7.0            | 0.071   |
| Mortality (% Died)                     | 29%                    | 13%                   | 22%                   | 0.189   |
| Lactate (g/dL)                         | 7.6 ± 5.2              | 6.4 ± 4.1             | 7.2 ± 3.7             | 0.211   |
| History of Antimalarials (% Yes)       | 53%                    | 68%                   | 56%                   | 0.261   |
| Hemoglobin (g/dL)                      | 7.0 ± 1.9              | 7.3 ± 2.1             | 9.0 ± 3.0             | 0.343   |
| Hematocrit (%)                         | 20.2 ± 5.8             | 21.0 ± 6.4            | 26.9 ± 8.6            | 0.348   |
| Temp (°C)                              | 38.9 ± 0.9             | 38.8 ± 1.5            | 38.9 ± 1.1            | 0.389   |
| Platelets (x 10 <sup>3</sup> cells/mL) | <b>70 [38.5 - 116]</b> | <b>59 [40 - 88]</b>   | 121 [31.5 - 264.5]    | 0.400   |
| Glucose (g/dL)                         | 6.6 ± 2.8              | 6.4 ± 2.5             | 8.7 ± 4.1             | 0.414   |
| Seizure Duration (Hours)               | 7 [3 - 18]             | 6 [3-10]              | 5 [3 - 6]             | 0.432   |
| HIV (% Positive)                       | <b>18%</b>             | <b>11%</b>            | 0%                    | 0.444   |
| History of LA (% Yes)                  | 29%                    | 23%                   | 17%                   | 0.456   |
| Fever Duration                         | 52 ± 25                | 53 ± 23               | 50 ± 28               | 0.460   |
| Age (Months)                           | 50 ± 29                | 38 ± 17               | 47.5 ± 23.2           | 0.568   |
| Gender (% Male)                        | <b>47%</b>             | <b>43%</b>            | 61%                   | 0.569   |
| Bednet (% used)                        | <b>71%</b>             | <b>73%</b>            | 44%                   | 0.581   |
